# Supplementary material for: Time Pressure and Health-Related Loss of Productivity in University Students: The Mediating Role of Exhaustion
Source: Frontiers journal article supplement (doi:10.3389/fpubh.2021.653440), 2021-04-27

Table. The items included in the student survey.

| No. | Construct                           | Variable | Wording                                                                                                  |
|-----|-------------------------------------|----------|----------------------------------------------------------------------------------------------------------|
| 1   | Time Pressure                       | TP1      | I have enough time to prepare and process the classes I attend.                                          |
| 2   |                                     | TP2      | I do not have enough time to complete study-related tasks with the appropriate care.                     |
| 3   |                                     | TP3      | I feel overwhelmed by all the work my studies require.                                                   |
| 4   | Exhaustion                          | EX1      | I feel emotionally drained by my studies.                                                                |
| 5   |                                     | EX2      | I feel tired when I get up in the morning and I have to face another day at the university.              |
| 6   |                                     | EX3      | Studying or attending a class is really a strain for me.                                                 |
| 7   | Health-related Loss of Productivity | HLP1     | Because of my acute health problems, the demands of my studies were much harder to handle.               |
| 8   |                                     | HLP2     | I was not able to focus on achieving my study goals, due to my acute health problems.                    |
| 9   |                                     | HLP3     | My acute health problems distracted me from taking pleasure in my studies.                               |
| 10  |                                     | HLP4     | I felt hopeless about finishing certain tasks, due to my acute health problems.                          |
| 11  |                                     | HLP5     | I did not feel energetic enough to complete all my study-related tasks, due to my acute health problems. |

Note. TP = Time Pressure; EX = exhaustion (MBI); HLP = Health-related Loss of Productivity; T1 = Time 1; T2 = Time 2; T3 = Time 3.

Table. Correlations of the study items.

|    |      |    | 1   | 2   | 3   | 4   | 5   | 6   | 7   | 8   | 9   | 10  | 11  | 12  | 13  | 14  | 15  | 16  | 17  | 18  | 19  | 20  | 21  | 22  | 23  | 24  | 25  | 26  | 27  | 28 | 29 | 30 | 31 | 32 |
|----|------|----|-----|-----|-----|-----|-----|-----|-----|-----|-----|-----|-----|-----|-----|-----|-----|-----|-----|-----|-----|-----|-----|-----|-----|-----|-----|-----|-----|----|----|----|----|----|
| 1  | TP1  | T1 |     |     |     |     |     |     |     |     |     |     |     |     |     |     |     |     |     |     |     |     |     |     |     |     |     |     |     |    |    |    |    |    |
| 2  | TP2  | T1 | .65 |     |     |     |     |     |     |     |     |     |     |     |     |     |     |     |     |     |     |     |     |     |     |     |     |     |     |    |    |    |    |    |
| 3  | TP3  | T1 | .59 | .66 |     |     |     |     |     |     |     |     |     |     |     |     |     |     |     |     |     |     |     |     |     |     |     |     |     |    |    |    |    |    |
| 4  | HLP1 | T1 | .28 | .24 | .36 |     |     |     |     |     |     |     |     |     |     |     |     |     |     |     |     |     |     |     |     |     |     |     |     |    |    |    |    |    |
| 5  | HLP3 | T1 | .24 | .23 | .35 | .72 |     |     |     |     |     |     |     |     |     |     |     |     |     |     |     |     |     |     |     |     |     |     |     |    |    |    |    |    |
| 6  | HLP4 | T1 | .26 | .23 | .35 | .76 | .67 |     |     |     |     |     |     |     |     |     |     |     |     |     |     |     |     |     |     |     |     |     |     |    |    |    |    |    |
| 7  | HLP2 | T1 | .25 | .26 | .35 | .79 | .75 | .74 |     |     |     |     |     |     |     |     |     |     |     |     |     |     |     |     |     |     |     |     |     |    |    |    |    |    |
| 8  | HLP5 | T1 | .27 | .20 | .34 | .77 | .73 | .70 | .79 |     |     |     |     |     |     |     |     |     |     |     |     |     |     |     |     |     |     |     |     |    |    |    |    |    |
| 9  | EX1  | T1 | .42 | .45 | .62 | .41 | .42 | .43 | .39 | .38 |     |     |     |     |     |     |     |     |     |     |     |     |     |     |     |     |     |     |     |    |    |    |    |    |
| 10 | EX2  | T1 | .30 | .30 | .35 | .30 | .33 | .32 | .32 | .34 | .57 |     |     |     |     |     |     |     |     |     |     |     |     |     |     |     |     |     |     |    |    |    |    |    |
| 11 | EX3  | T1 | .29 | .35 | .45 | .40 | .41 | .44 | .40 | .42 | .66 | .57 |     |     |     |     |     |     |     |     |     |     |     |     |     |     |     |     |     |    |    |    |    |    |
| 12 | TP1  | T2 | .59 | .53 | .50 | .18 | .19 | .18 | .18 | .20 | .36 | .24 | .24 |     |     |     |     |     |     |     |     |     |     |     |     |     |     |     |     |    |    |    |    |    |
| 13 | TP2  | T2 | .47 | .57 | .56 | .24 | .22 | .28 | .27 | .23 | .43 | .28 | .37 | .66 |     |     |     |     |     |     |     |     |     |     |     |     |     |     |     |    |    |    |    |    |
| 14 | TP3  | T2 | .45 | .48 | .62 | .34 | .29 | .35 | .33 | .32 | .53 | .35 | .37 | .60 | .67 |     |     |     |     |     |     |     |     |     |     |     |     |     |     |    |    |    |    |    |
| 15 | HLP1 | T2 | .10 | .14 | .24 | .54 | .46 | .48 | .48 | .51 | .30 | .31 | .39 | .15 | .25 | .25 |     |     |     |     |     |     |     |     |     |     |     |     |     |    |    |    |    |    |
| 16 | HLP3 | T2 | .12 | .13 | .26 | .48 | .47 | .45 | .49 | .47 | .36 | .38 | .39 | .17 | .24 | .28 | .80 |     |     |     |     |     |     |     |     |     |     |     |     |    |    |    |    |    |
| 17 | HLP4 | T2 | .07 | .16 | .21 | .51 | .47 | .53 | .51 | .50 | .34 | .27 | .40 | .14 | .25 | .27 | .80 | .74 |     |     |     |     |     |     |     |     |     |     |     |    |    |    |    |    |
| 18 | HLP2 | T2 | .10 | .14 | .23 | .53 | .47 | .51 | .51 | .51 | .30 | .34 | .39 | .16 | .26 | .26 | .85 | .82 | .78 |     |     |     |     |     |     |     |     |     |     |    |    |    |    |    |
| 19 | HLP5 | T2 | .08 | .14 | .22 | .49 | .43 | .45 | .44 | .47 | .31 | .35 | .38 | .18 | .24 | .27 | .85 | .82 | .74 | .84 |     |     |     |     |     |     |     |     |     |    |    |    |    |    |
| 20 | EX1  | T2 | .38 | .41 | .56 | .37 | .38 | .44 | .41 | .36 | .67 | .50 | .56 | .47 | .58 | .65 | .34 | .39 | .37 | .34 | .37 |     |     |     |     |     |     |     |     |    |    |    |    |    |
| 21 | EX2  | T2 | .25 | .31 | .36 | .28 | .33 | .36 | .35 | .35 | .47 | .62 | .52 | .35 | .40 | .41 | .36 | .41 | .37 | .36 | .40 | .67 |     |     |     |     |     |     |     |    |    |    |    |    |
| 22 | EX3  | T2 | .28 | .38 | .43 | .36 | .36 | .41 | .39 | .38 | .53 | .50 | .64 | .36 | .49 | .46 | .45 | .47 | .44 | .46 | .46 | .68 | .69 |     |     |     |     |     |     |    |    |    |    |    |
| 23 | TP1  | T3 | .49 | .48 | .51 | .17 | .23 | .21 | .22 | .17 | .34 | .19 | .24 | .61 | .56 | .49 | .15 | .16 | .14 | .12 | .14 | .44 | .29 | .30 |     |     |     |     |     |    |    |    |    |    |
| 24 | TP2  | T3 | .41 | .49 | .46 | .20 | .21 | .26 | .24 | .21 | .36 | .29 | .32 | .49 | .61 | .51 | .24 | .23 | .20 | .23 | .23 | .44 | .33 | .36 | .63 |     |     |     |     |    |    |    |    |    |
| 25 | TP3  | T3 | .43 | .50 | .60 | .24 | .28 | .27 | .28 | .24 | .51 | .33 | .39 | .49 | .54 | .64 | .27 | .31 | .27 | .26 | .28 | .58 | .41 | .44 | .57 | .68 |     |     |     |    |    |    |    |    |
| 26 | HLP1 | T3 | .13 | .22 | .23 | .49 | .43 | .41 | .44 | .46 | .32 | .31 | .42 | .13 | .17 | .20 | .49 | .48 | .44 | .46 | .49 | .34 | .33 | .40 | .22 | .24 | .32 |     |     |    |    |    |    |    |
| 27 | HLP3 | T3 | .14 | .22 | .28 | .47 | .46 | .43 | .46 | .48 | .38 | .33 | .36 | .18 | .21 | .23 | .43 | .49 | .43 | .44 | .47 | .36 | .31 | .40 | .22 | .25 | .34 | .80 |     |    |    |    |    |    |
| 28 | HLP4 | T3 | .18 | .26 | .28 | .48 | .44 | .46 | .48 | .48 | .34 | .31 | .41 | .17 | .23 | .18 | .48 | .51 | .47 | .49 | .49 | .36 | .32 | .42 | .23 | .30 | .34 | .82 | .81 |    |    |    |    |    |

|    |      |    |     |     |     |     |     |     |     |     |     |     |     |     |     |     |     |     |     |     |     |     |     |     |     |     |     |     |     |     |     |     |     |     |
|----|------|----|-----|-----|-----|-----|-----|-----|-----|-----|-----|-----|-----|-----|-----|-----|-----|-----|-----|-----|-----|-----|-----|-----|-----|-----|-----|-----|-----|-----|-----|-----|-----|-----|
| 29 | HLP2 | T3 | .15 | .27 | .27 | .50 | .46 | .46 | .48 | .48 | .32 | .29 | .37 | .14 | .22 | .21 | .48 | .47 | .48 | .47 | .47 | .33 | .31 | .38 | .25 | .26 | .30 | .84 | .80 | .84 |     |     |     |     |
| 30 | HLP5 | T3 | .16 | .24 | .27 | .48 | .47 | .45 | .48 | .49 | .34 | .33 | .39 | .16 | .23 | .25 | .45 | .46 | .44 | .47 | .46 | .36 | .36 | .41 | .26 | .29 | .36 | .83 | .80 | .80 | .85 |     |     |     |
| 31 | EX1  | T3 | .36 | .45 | .55 | .32 | .34 | .35 | .36 | .32 | .63 | .47 | .53 | .41 | .51 | .53 | .33 | .38 | .34 | .31 | .35 | .69 | .56 | .56 | .47 | .52 | .68 | .39 | .44 | .43 | .40 | .43 |     |     |
| 32 | EX2  | T3 | .25 | .34 | .37 | .33 | .35 | .40 | .38 | .39 | .48 | .56 | .52 | .28 | .36 | .37 | .37 | .39 | .38 | .36 | .38 | .54 | .61 | .53 | .35 | .41 | .47 | .41 | .44 | .44 | .44 | .46 | .71 |     |
| 33 | EX3  | T3 | .27 | .36 | .46 | .35 | .38 | .37 | .35 | .37 | .53 | .46 | .58 | .33 | .43 | .42 | .40 | .39 | .38 | .39 | .38 | .55 | .50 | .62 | .39 | .44 | .52 | .44 | .46 | .48 | .45 | .48 | .71 | .70 |

Note. TP = Time Pressure; EX = exhaustion (MBI); HLP = Health-related Loss of Productivity; T1 = Time 1; T2 = Time 2; T3 = Time 3.

Figure. The reversed model (M2).

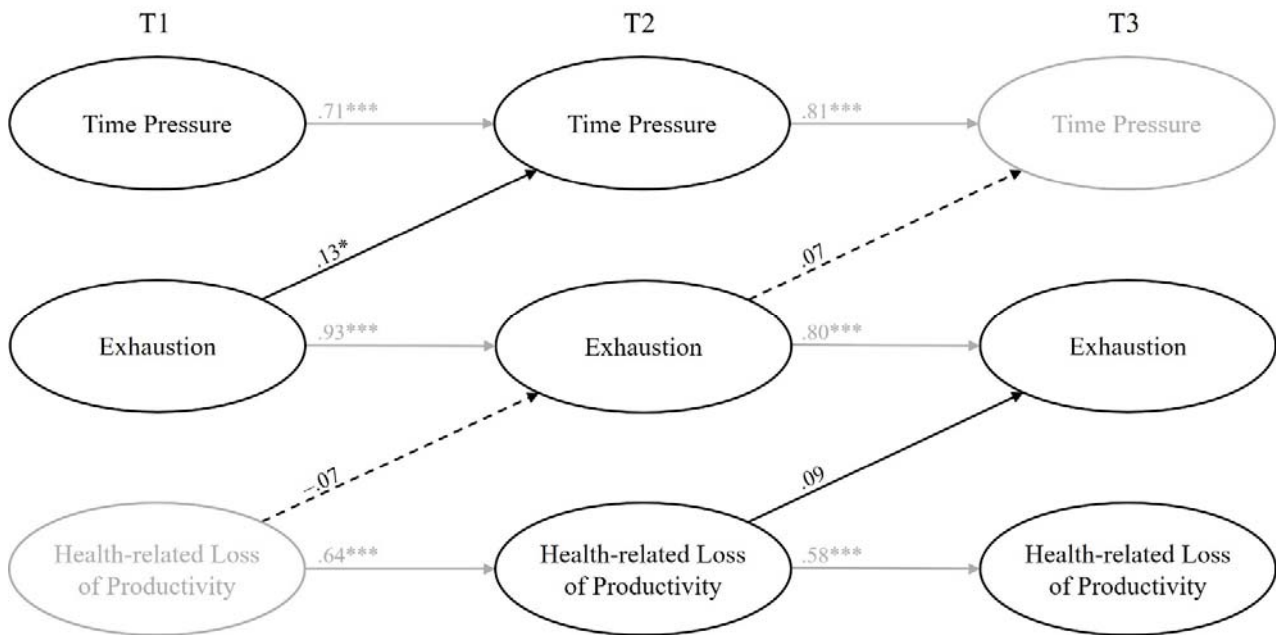

Figure. The reciprocal model (M3).

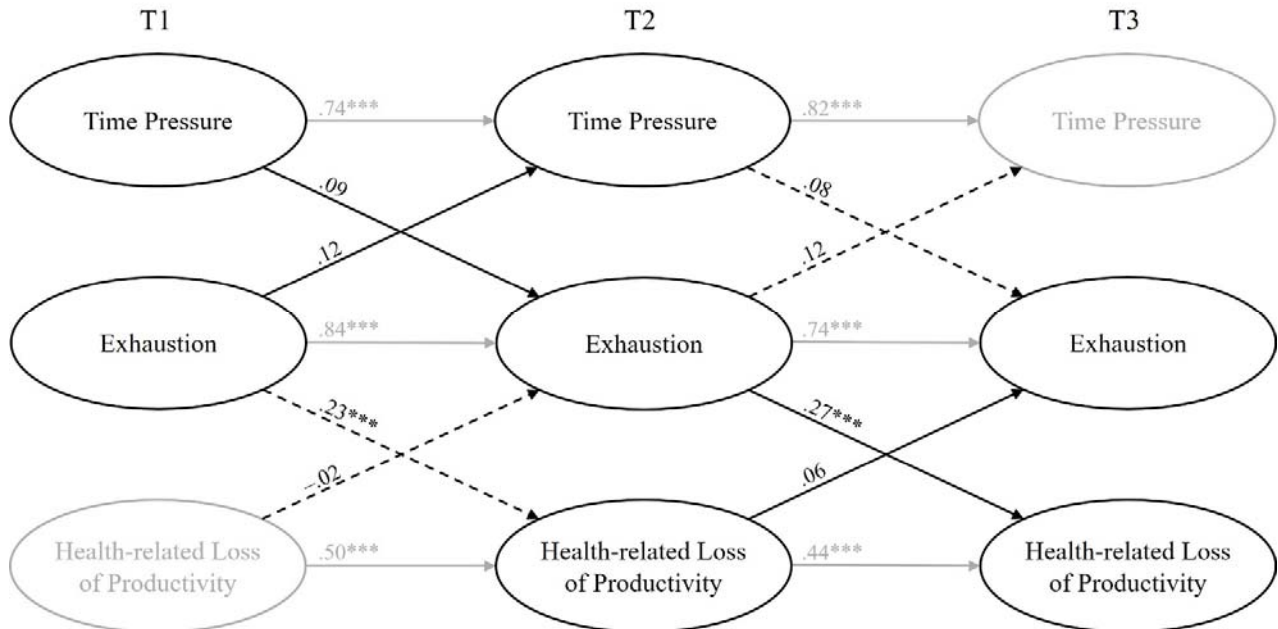

Supplement: Data_Sheet_1.pdf [file Data_Sheet_1.pdf]
